# Supplementary material
Source: PubMed Central journal article supplement (PMC7848695)
Supplement: pnas.2014634118.sd02.pdf [file pnas.2014634118.sd02.pdf]

# Homer de novo Motif Results

(/zfs/venom/Crotalus\_genomes/Ctigris\_CLP2741/ATAC\_Seq/HOMER/Genrich\_Run1/Genrich\_Filtered\_Hard50Overlap\_ATAC\_All\_VG\_Combined//)

[Known Motif Enrichment Results](#)

[Gene Ontology Enrichment Results](#)

If Homer is having trouble matching a motif to a known motif, try copy/pasting the matrix file into [STAMP](#)

More information on motif finding results: [HOMER](#) | [Description of Results](#) | [Tips](#)

Total target sequences = 2446

Total background sequences = 44026

\* - possible false positive

| Rank | Motif                                                                              | P-value | log P-value | % of Targets | % of Background | STD(Bg STD)     | Best Match/Details                                                                                                                    | Motif File                          |
|------|------------------------------------------------------------------------------------|---------|-------------|--------------|-----------------|-----------------|---------------------------------------------------------------------------------------------------------------------------------------|-------------------------------------|
| 1    |    | 1e-111  | -2.568e+02  | 14.47%       | 3.46%           | 46.8bp (63.4bp) | GRHL2/MA1105.1/Jaspar(0.874)<br><a href="#">More Information</a>   <a href="#">Similar Motifs Found</a>                               | <a href="#">motif file (matrix)</a> |
| 2    |    | 1e-110  | -2.544e+02  | 31.15%       | 13.56%          | 52.3bp (63.3bp) | NFIC/MA0161.2/Jaspar(0.949)<br><a href="#">More Information</a>   <a href="#">Similar Motifs Found</a>                                | <a href="#">motif file (matrix)</a> |
| 3    |    | 1e-97   | -2.256e+02  | 17.05%       | 5.24%           | 53.0bp (64.7bp) | FOXA1(Forkhead)/MCF7-FOXA1-ChIP-Seq(GSE26831)/Homer(0.940)<br><a href="#">More Information</a>   <a href="#">Similar Motifs Found</a> | <a href="#">motif file (matrix)</a> |
| 4    |    | 1e-84   | -1.936e+02  | 1.43%        | 0.00%           | 43.9bp (0.0bp)  | PU.1(ETS)/ThioMac-PU.1-ChIP-Seq(GSE21512)/Homer(0.740)<br><a href="#">More Information</a>   <a href="#">Similar Motifs Found</a>     | <a href="#">motif file (matrix)</a> |
| 5    |    | 1e-70   | -1.616e+02  | 1.23%        | 0.00%           | 49.7bp (3.2bp)  | RORgt(NR)/EL4-RORgt.Flag-ChIP-Seq(GSE56019)/Homer(0.638)<br><a href="#">More Information</a>   <a href="#">Similar Motifs Found</a>   | <a href="#">motif file (matrix)</a> |
| 6    |    | 1e-67   | -1.553e+02  | 1.19%        | 0.00%           | 45.5bp (54.9bp) | PB0062.1_Sox12_1/Jaspar(0.649)<br><a href="#">More Information</a>   <a href="#">Similar Motifs Found</a>                             | <a href="#">motif file (matrix)</a> |
| 7    |    | 1e-61   | -1.409e+02  | 1.23%        | 0.01%           | 51.9bp (0.0bp)  | RELB/MA1117.1/Jaspar(0.685)<br><a href="#">More Information</a>   <a href="#">Similar Motifs Found</a>                                | <a href="#">motif file (matrix)</a> |
| 8    |    | 1e-51   | -1.186e+02  | 1.06%        | 0.01%           | 37.6bp (0.0bp)  | SMAD3/MA0795.1/Jaspar(0.607)<br><a href="#">More Information</a>   <a href="#">Similar Motifs Found</a>                               | <a href="#">motif file (matrix)</a> |
| 9    |    | 1e-48   | -1.122e+02  | 0.90%        | 0.00%           | 40.2bp (0.0bp)  | PU.1(ETS)/ThioMac-PU.1-ChIP-Seq(GSE21512)/Homer(0.600)<br><a href="#">More Information</a>   <a href="#">Similar Motifs Found</a>     | <a href="#">motif file (matrix)</a> |
| 10   |    | 1e-48   | -1.122e+02  | 0.90%        | 0.00%           | 61.7bp (28.2bp) | PB0155.1_Osr2_2/Jaspar(0.622)<br><a href="#">More Information</a>   <a href="#">Similar Motifs Found</a>                              | <a href="#">motif file (matrix)</a> |
| 11   |   | 1e-46   | -1.062e+02  | 0.86%        | 0.00%           | 48.9bp (43.3bp) | Nkx2-5(var.2)/MA0503.1/Jaspar(0.615)<br><a href="#">More Information</a>   <a href="#">Similar Motifs Found</a>                       | <a href="#">motif file (matrix)</a> |
| 12   |  | 1e-45   | -1.055e+02  | 1.10%        | 0.01%           | 49.6bp (27.6bp) | MZF1/MA0056.1/Jaspar(0.689)<br><a href="#">More Information</a>   <a href="#">Similar Motifs Found</a>                                | <a href="#">motif file (matrix)</a> |
| 13   |  | 1e-42   | -9.701e+01  | 0.90%        | 0.01%           | 56.8bp (61.3bp) | Arid3b/MA0601.1/Jaspar(0.638)<br><a href="#">More Information</a>   <a href="#">Similar Motifs Found</a>                              | <a href="#">motif file (matrix)</a> |
| 14   |  | 1e-41   | -9.594e+01  | 1.02%        | 0.01%           | 46.8bp (27.7bp) | POL009.1_DCE_S_II/Jaspar(0.580)<br><a href="#">More Information</a>   <a href="#">Similar Motifs Found</a>                            | <a href="#">motif file (matrix)</a> |
| 15   |  | 1e-39   | -9.171e+01  | 0.86%        | 0.01%           | 39.0bp (0.0bp)  | E2F4(E2F)/K562-E2F4-ChIP-Seq(GSE31477)/Homer(0.606)<br><a href="#">More Information</a>   <a href="#">Similar Motifs Found</a>        | <a href="#">motif file (matrix)</a> |
| 16   |  | 1e-39   | -9.117e+01  | 1.14%        | 0.02%           | 55.1bp (69.6bp) | NFAT5/MA0606.1/Jaspar(0.692)<br><a href="#">More Information</a>   <a href="#">Similar Motifs Found</a>                               | <a href="#">motif file (matrix)</a> |
| 17   |  | 1e-37   | -8.539e+01  | 5.64%        | 1.52%           | 47.6bp (68.3bp) | CREB1/MA0018.3/Jaspar(0.894)<br><a href="#">More Information</a>   <a href="#">Similar Motifs Found</a>                               | <a href="#">motif file (matrix)</a> |
| 18   |  | 1e-35   | -8.126e+01  | 0.78%        | 0.01%           | 50.8bp (0.0bp)  | AMYB(HTH)/Testes-AMYB-ChIP-Seq(GSE44588)/Homer(0.629)<br><a href="#">More Information</a>   <a href="#">Similar Motifs Found</a>      | <a href="#">motif file (matrix)</a> |
| 19   |  | 1e-33   | -7.729e+01  | 0.94%        | 0.02%           | 50.4bp (45.8bp) | NRF1(NRF)/MCF7-NRF1-ChIP-Seq(Unpublished)/Homer(0.641)<br><a href="#">More Information</a>   <a href="#">Similar Motifs Found</a>     | <a href="#">motif file (matrix)</a> |
| 20   |  | 1e-33   | -7.628e+01  | 1.10%        | 0.03%           | 69.9bp (58.8bp) | ZNF768(Zf)/Raji-ZNF768-ChIP-Seq(GSE111879)/Homer(0.805)<br><a href="#">More Information</a>   <a href="#">Similar Motifs Found</a>    | <a href="#">motif file (matrix)</a> |
| 21   |  | 1e-30   | -7.102e+01  | 0.70%        | 0.01%           | 50.5bp (45.5bp) | ISRE(IRF)/ThioMac-LPS-Expression(GSE23622)/Homer(0.723)<br><a href="#">More Information</a>   <a href="#">Similar Motifs Found</a>    | <a href="#">motif file (matrix)</a> |
| 22   |  | 1e-30   | -7.102e+01  | 0.70%        | 0.00%           | 51.9bp (6.0bp)  | PB0192.1_Tcfap2e_2/Jaspar(0.783)<br><a href="#">More Information</a>   <a href="#">Similar Motifs Found</a>                           | <a href="#">motif file (matrix)</a> |
| 23   |  | 1e-30   | -7.078e+01  | 0.94%        | 0.02%           | 44.6bp (35.7bp) | MZF1(var.2)/MA0057.1/Jaspar(0.819)<br><a href="#">More Information</a>   <a href="#">Similar Motifs Found</a>                         | <a href="#">motif file (matrix)</a> |
| 24   |  | 1e-29   | -6.829e+01  | 0.82%        | 0.01%           | 46.8bp (26.2bp) | HMBX1/MA0895.1/Jaspar(0.770)<br><a href="#">More Information</a>   <a href="#">Similar Motifs Found</a>                               | <a href="#">motif file (matrix)</a> |
| 25   |  | 1e-28   | -6.574e+01  | 0.57%        | 0.00%           | 57.1bp (0.0bp)  | PB0092.1_Zbtb7b_1/Jaspar(0.641)<br><a href="#">More Information</a>   <a href="#">Similar Motifs Found</a>                            | <a href="#">motif file (matrix)</a> |
| 26   |  | 1e-27   | -6.390e+01  | 14.84%       | 8.11%           | 52.5bp (75.4bp) | SP2/MA0516.1/Jaspar(0.855)<br><a href="#">More Information</a>   <a href="#">Similar Motifs Found</a>                                 | <a href="#">motif file (matrix)</a> |
| 27   |  | 1e-26   | -6.100e+01  | 0.61%        | 0.01%           | 50.7bp (0.0bp)  | IRF5/MA1420.1/Jaspar(0.790)<br><a href="#">More Information</a>   <a href="#">Similar Motifs Found</a>                                | <a href="#">motif file (matrix)</a> |
| 28   |  | 1e-26   | -6.100e+01  | 0.61%        | 0.01%           | 55.0bp (48.6bp) | RUNX3/MA0684.1/Jaspar(0.637)<br><a href="#">More Information</a>   <a href="#">Similar Motifs Found</a>                               | <a href="#">motif file (matrix)</a> |
| 29   |  | 1e-25   | -5.862e+01  | 7.11%        | 2.89%           | 53.0bp (77.9bp) | PB0009.1_E2F3_1/Jaspar(0.696)<br><a href="#">More Information</a>   <a href="#">Similar Motifs Found</a>                              | <a href="#">motif file (matrix)</a> |
| 30   |  | 1e-25   | -5.805e+01  | 17.25%       | 10.27%          | 55.5bp (67.7bp) | TEAD2/MA1121.1/Jaspar(0.731)<br><a href="#">More Information</a>   <a href="#">Similar Motifs Found</a>                               | <a href="#">motif file (matrix)</a> |
| 31   |  | 1e-23   | -5.323e+01  | 6.66%        | 2.76%           | 59.1bp (63.6bp) | PB0091.1_Zbtb3_1/Jaspar(0.641)<br><a href="#">More Information</a>   <a href="#">Similar Motifs Found</a>                             | <a href="#">motif file (matrix)</a> |
| 32   |  | 1e-22   | -5.121e+01  | 4.09%        | 1.28%           | 52.8bp (70.5bp) | NFY(CCAAT)/Promoter/Homer(0.830)<br><a href="#">More Information</a>   <a href="#">Similar Motifs Found</a>                           | <a href="#">motif file (matrix)</a> |
| 33   |  | 1e-19   | -4.481e+01  | 1.43%        | 0.18%           | 56.3bp (73.1bp) | POL008.1_DCE_S_I/Jaspar(0.598)<br><a href="#">More Information</a>   <a href="#">Similar Motifs Found</a>                             | <a href="#">motif file (matrix)</a> |
| 34   |  | 1e-12   | -2.812e+01  | 2.62%        | 0.93%           | 54.1bp (66.9bp) | CEBPG/MA0838.1/Jaspar(0.786)<br><a href="#">More Information</a>   <a href="#">Similar Motifs Found</a>                               | <a href="#">motif file (matrix)</a> |
| 35 * |  | 1e-6    | -1.479e+01  | 0.16%        | 0.00%           | 57.0bp (24.7bp) | KIF12/MA0742.1/Jaspar(0.678)<br><a href="#">More Information</a>   <a href="#">Similar Motifs Found</a>                               | <a href="#">motif file (matrix)</a> |
