# Supplementary material
Source: PubMed Central journal article supplement (PMC7848695)
Supplement: pnas.2014634118.sd03.pdf [file pnas.2014634118.sd03.pdf]

Homer Known Motif Enrichment Results  
(/zfs/venom/Crotalus\_genomes/Ctigris\_CLP2741/ATAC\_Seq/HOMER/Genrich\_Run1/Genrich\_Filtered\_Hard50Overlap\_ATAC\_All\_VG\_Combined/)

| Homer, dC, novel Motif Results                                    |                   |                                                                      |         |             |                     |                               |                                   |                                   |                                      | Known Motif Enrichment Results |                     |  |  |  |  |  |  |  |  | Known Motif Enrichment Results (not file) |  |  |  |  |  |  |  |  |  |  |  |  |  |  |  |  |  |  |  |
|-------------------------------------------------------------------|-------------------|----------------------------------------------------------------------|---------|-------------|---------------------|-------------------------------|-----------------------------------|-----------------------------------|--------------------------------------|--------------------------------|---------------------|--|--|--|--|--|--|--|--|-------------------------------------------|--|--|--|--|--|--|--|--|--|--|--|--|--|--|--|--|--|--|--|
| Total Target Sequences = 2446, Total Background Sequences = 44046 |                   |                                                                      |         |             |                     |                               |                                   |                                   |                                      |                                |                     |  |  |  |  |  |  |  |  |                                           |  |  |  |  |  |  |  |  |  |  |  |  |  |  |  |  |  |  |  |
| Rank                                                              | Motif             | Name                                                                 | P-value | log P-value | q-value (Benjamini) | # Target Sequences with Motif | % of Targets Sequences with Motif | # Background Sequences with Motif | % of Background Sequences with Motif | Motif File                     | SVG                 |  |  |  |  |  |  |  |  |                                           |  |  |  |  |  |  |  |  |  |  |  |  |  |  |  |  |  |  |  |
| 1                                                                 | AAACCTCTTAACTGTTT | GRHL2(CP24)/HBE-GRHL2-ChIP-Seq(GSE46194)/Homer                       | 1e-183  | -4.218e+020 | 0.0000              | 454.0                         | 18.56%                            | 15460                             | 3.51%                                | <a href="#">motif file</a>     | <a href="#">svg</a> |  |  |  |  |  |  |  |  |                                           |  |  |  |  |  |  |  |  |  |  |  |  |  |  |  |  |  |  |  |
| 2                                                                 | AAAGTAAACA        | FOXAI1(Forkhead)/LNCAP-FOXAI1-ChIP-Seq(GSE27824)/Homer               | 1e-111  | -2.558e+020 | 0.0000              | 679.0                         | 27.76%                            | 4925.2                            | 11.19%                               | <a href="#">motif file</a>     | <a href="#">svg</a> |  |  |  |  |  |  |  |  |                                           |  |  |  |  |  |  |  |  |  |  |  |  |  |  |  |  |  |  |  |
| 3                                                                 | CTGTGTTTACATA     | Foxa2(Forkhead)/Liver-Foxa2-ChIP-Seq(GSE25694)/Homer                 | 1e-106  | -2.464e+020 | 0.0000              | 496.0                         | 20.28%                            | 2948.2                            | 6.70%                                | <a href="#">motif file</a>     | <a href="#">svg</a> |  |  |  |  |  |  |  |  |                                           |  |  |  |  |  |  |  |  |  |  |  |  |  |  |  |  |  |  |  |
| 4                                                                 | AAAGTAAACA        | FOXAI1(Forkhead)/MCF7-FOXAI1-ChIP-Seq(GSE26831)/Homer                | 1e-101  | -2.344e+020 | 0.0000              | 588.0                         | 24.04%                            | 4075.0                            | 9.26%                                | <a href="#">motif file</a>     | <a href="#">svg</a> |  |  |  |  |  |  |  |  |                                           |  |  |  |  |  |  |  |  |  |  |  |  |  |  |  |  |  |  |  |
| 5                                                                 | TTGTGTTATTTGGCA   | NFI1(FOXAI1)/CTCF-Forkhead/LNCAP-FOXAI1-ChIP-Seq(GSE27824)/Homer     | 1e-92   | -2.138e+020 | 0.0000              | 139.0                         | 5.68%                             | 227.7                             | 0.52%                                | <a href="#">motif file</a>     | <a href="#">svg</a> |  |  |  |  |  |  |  |  |                                           |  |  |  |  |  |  |  |  |  |  |  |  |  |  |  |  |  |  |  |
| 6                                                                 | CTGTGTTTACATAGC   | Foxa3(Forkhead)/Liver-Foxa3-ChIP-Seq(GSE77670)/Homer                 | 1e-92   | -2.127e+020 | 0.0000              | 276.0                         | 11.28%                            | 1110.5                            | 2.52%                                | <a href="#">motif file</a>     | <a href="#">svg</a> |  |  |  |  |  |  |  |  |                                           |  |  |  |  |  |  |  |  |  |  |  |  |  |  |  |  |  |  |  |
| 7                                                                 | CTCTCTGTAACAAG    | FoxEbox(Forkhead)/HLH1/Panc1-Foxa2-ChIP-Seq(GSE47459)/Homer          | 1e-86   | -1.985e+020 | 0.0000              | 488.0                         | 19.95%                            | 3296.5                            | 7.49%                                | <a href="#">motif file</a>     | <a href="#">svg</a> |  |  |  |  |  |  |  |  |                                           |  |  |  |  |  |  |  |  |  |  |  |  |  |  |  |  |  |  |  |
| 8                                                                 | ETGCCAAG          | NFI1-halfsite(CTF)/LNCaP-NFI1-ChIP-Seq(Unpublished)/Homer            | 1e-78   | -1.818e+020 | 0.0000              | 873.0                         | 35.69%                            | 8519.2                            | 19.35%                               | <a href="#">motif file</a>     | <a href="#">svg</a> |  |  |  |  |  |  |  |  |                                           |  |  |  |  |  |  |  |  |  |  |  |  |  |  |  |  |  |  |  |
| 9                                                                 | TATTTTACCTA       | FOXMI1(Forkhead)/MCF7-FOXMI1-ChIP-Seq(GSE72977)/Homer                | 1e-75   | -1.729e+020 | 0.0000              | 576.0                         | 23.55%                            | 4637.7                            | 10.53%                               | <a href="#">motif file</a>     | <a href="#">svg</a> |  |  |  |  |  |  |  |  |                                           |  |  |  |  |  |  |  |  |  |  |  |  |  |  |  |  |  |  |  |
| 10                                                                | TGTTTATTAGC       | FoxD3(Forkhead)/Zebrafish-Embryo-PoD3-huon-ChIP-seq(GSE106674)/Homer | 1e-63   | -1.463e+020 | 0.0000              | 490.0                         | 20.03%                            | 3915.5                            | 8.89%                                | <a href="#">motif file</a>     | <a href="#">svg</a> |  |  |  |  |  |  |  |  |                                           |  |  |  |  |  |  |  |  |  |  |  |  |  |  |  |  |  |  |  |
| 11                                                                | AAATATAAACAAG     | FoxL2(Forkhead)/Ovary-FoxL2-ChIP-Seq(GSE60850)/Homer                 | 1e-57   | -1.330e+020 | 0.0000              | 430.0                         | 17.58%                            | 3353.9                            | 7.62%                                | <a href="#">motif file</a>     | <a href="#">svg</a> |  |  |  |  |  |  |  |  |                                           |  |  |  |  |  |  |  |  |  |  |  |  |  |  |  |  |  |  |  |
| 12                                                                | CTTGCCACTCTGCCAG  | NFI1(CTF)/LNCaP-NFI1-ChIP-Seq(Unpublished)/Homer                     | 1e-56   | -1.300e+020 | 0.0000              | 233.0                         | 9.53%                             | 1232.2                            | 2.80%                                | <a href="#">motif file</a>     | <a href="#">svg</a> |  |  |  |  |  |  |  |  |                                           |  |  |  |  |  |  |  |  |  |  |  |  |  |  |  |  |  |  |  |
| 13                                                                | AGTAAACA          | Foxo3(Forkhead)/U2OS-Foxo3-ChIP-Seq(MTAB-2701)/Homer                 | 1e-52   | -1.207e+020 | 0.0000              | 363.0                         | 14.84%                            | 2707.7                            | 6.15%                                | <a href="#">motif file</a>     | <a href="#">svg</a> |  |  |  |  |  |  |  |  |                                           |  |  |  |  |  |  |  |  |  |  |  |  |  |  |  |  |  |  |  |
| 14                                                                | TTATATAAACAAG     | Foxf1(Forkhead)/Lung-Foxf1-ChIP-Seq(GSE77951)/Homer                  | 1e-49   | -1.131e+020 | 0.0000              | 432.0                         | 17.66%                            | 3647.8                            | 8.29%                                | <a href="#">motif file</a>     | <a href="#">svg</a> |  |  |  |  |  |  |  |  |                                           |  |  |  |  |  |  |  |  |  |  |  |  |  |  |  |  |  |  |  |
| 15                                                                | CTGTGTTTAC        | FOXK1(Forkhead)/HEK293-FOXK1-ChIP-Seq(GSE51673)/Homer                | 1e-49   | -1.131e+020 | 0.0000              | 470.0                         | 19.22%                            | 4134.5                            | 9.39%                                | <a href="#">motif file</a>     | <a href="#">svg</a> |  |  |  |  |  |  |  |  |                                           |  |  |  |  |  |  |  |  |  |  |  |  |  |  |  |  |  |  |  |
| 16                                                                | AGCAGGAAGT        | ELF3(ETS)/PDC-ELF3-ChIP-Seq(GSE64557)/Homer                          | 1e-45   | -1.044e+020 | 0.0000              | 351.0                         | 14.35%                            | 2768.2                            | 6.29%                                | <a href="#">motif file</a>     | <a href="#">svg</a> |  |  |  |  |  |  |  |  |                                           |  |  |  |  |  |  |  |  |  |  |  |  |  |  |  |  |  |  |  |
| 17                                                                | TTTGTTTTACCT      | FOXPI1(Forkhead)/H9-FOXPI1-ChIP-Seq(GSE31006)/Homer                  | 1e-42   | -9.726e+010 | 0.0000              | 237.0                         | 9.69%                             | 1549.9                            | 3.52%                                | <a href="#">motif file</a>     | <a href="#">svg</a> |  |  |  |  |  |  |  |  |                                           |  |  |  |  |  |  |  |  |  |  |  |  |  |  |  |  |  |  |  |
| 18                                                                | CTGCCAGCTGCCA     | Tlx3(NR)/NPC-H3K4me1-ChIP-Seq(GSE16256)/Homer                        | 1e-38   | -8.867e+010 | 0.0000              | 227.0                         | 9.28%                             | 1528.7                            | 3.47%                                | <a href="#">motif file</a>     | <a href="#">svg</a> |  |  |  |  |  |  |  |  |                                           |  |  |  |  |  |  |  |  |  |  |  |  |  |  |  |  |  |  |  |
| 19                                                                | CTGTGTTTACAT      | FOXK2(Forkhead)/U2OS-FOXK2-ChIP-Seq(MTAB-2204)/Homer                 | 1e-37   | -8.587e+010 | 0.0000              | 303.0                         | 12.39%                            | 2437.0                            | 5.54%                                | <a href="#">motif file</a>     | <a href="#">svg</a> |  |  |  |  |  |  |  |  |                                           |  |  |  |  |  |  |  |  |  |  |  |  |  |  |  |  |  |  |  |
| 20                                                                | AGCAGGAAGT        | EHF1(ETS)/LoVo-EHF-ChIP-Seq(GSE49402)/Homer                          | 1e-33   | -7.709e+010 | 0.0000              | 550.0                         | 22.49%                            | 5914.9                            | 13.44%                               | <a href="#">motif file</a>     | <a href="#">svg</a> |  |  |  |  |  |  |  |  |                                           |  |  |  |  |  |  |  |  |  |  |  |  |  |  |  |  |  |  |  |
| 21                                                                | CTGTTTAC          | Foxo1(Forkhead)/RAW-Foxo1-ChIP-Seq(Fan_et_al)/Homer                  | 1e-31   | -7.315e+010 | 0.0000              | 657.0                         | 26.86%                            | 7597.6                            | 17.26%                               | <a href="#">motif file</a>     | <a href="#">svg</a> |  |  |  |  |  |  |  |  |                                           |  |  |  |  |  |  |  |  |  |  |  |  |  |  |  |  |  |  |  |
| 22                                                                | ACTTCCCTCT        | EHF4(ETS)/BMDM-EHF4-ChIP-Seq(GSE38699)/Homer                         | 1e-30   | -7.043e+010 | 0.0000              | 428.0                         | 17.50%                            | 4331.1                            | 9.84%                                | <a href="#">motif file</a>     | <a href="#">svg</a> |  |  |  |  |  |  |  |  |                                           |  |  |  |  |  |  |  |  |  |  |  |  |  |  |  |  |  |  |  |
| 23                                                                | AGCAGGAAGT        | ELF5(ETS)/T47D-ELF5-ChIP-Seq(GSE30407)/Homer                         | 1e-30   | -7.036e+010 | 0.0000              | 317.0                         | 12.96%                            | 2846.8                            | 6.47%                                | <a href="#">motif file</a>     | <a href="#">svg</a> |  |  |  |  |  |  |  |  |                                           |  |  |  |  |  |  |  |  |  |  |  |  |  |  |  |  |  |  |  |
| 24                                                                | ACATCCCTCT        | SPDEF(ETS)/VCap-SPDEF-ChIP-Seq(SRA014231)/Homer                      | 1e-29   | -6.679e+010 | 0.0000              | 402.0                         | 16.43%                            | 4047.4                            | 9.19%                                | <a href="#">motif file</a>     | <a href="#">svg</a> |  |  |  |  |  |  |  |  |                                           |  |  |  |  |  |  |  |  |  |  |  |  |  |  |  |  |  |  |  |
| 25                                                                | AGTGGCCCGAGC      | Sp5(Zf)/mES-Sp5-Flag-ChIP-Seq(GSE72989)/Homer                        | 1e-28   | -6.601e+010 | 0.0000              | 419.0                         | 17.13%                            | 4299.7                            | 9.77%                                | <a href="#">motif file</a>     | <a href="#">svg</a> |  |  |  |  |  |  |  |  |                                           |  |  |  |  |  |  |  |  |  |  |  |  |  |  |  |  |  |  |  |
| 26                                                                | AGCAGGAAGT        | ETV1(ETS)/GIST48-ETV1-ChIP-Seq(GSE22441)/Homer                       | 1e-27   | -6.447e+010 | 0.0000              | 547.0                         | 22.36%                            | 6178.8                            | 14.04%                               | <a href="#">motif file</a>     | <a href="#">svg</a> |  |  |  |  |  |  |  |  |                                           |  |  |  |  |  |  |  |  |  |  |  |  |  |  |  |  |  |  |  |
| 27                                                                | CTGACGTCA         | Air1(2ZIP)/K562-ATF1-ChIP-Seq(GSE11477)/Homer                        | 1e-26   | -6.133e+010 | 0.0000              | 234.0                         | 9.57%                             | 1945.2                            | 4.42%                                | <a href="#">motif file</a>     | <a href="#">svg</a> |  |  |  |  |  |  |  |  |                                           |  |  |  |  |  |  |  |  |  |  |  |  |  |  |  |  |  |  |  |
| 28                                                                | ACAGGAAAGT        | ERG(ETS)/VCap-ERG-ChIP-Seq(GSE14097)/Homer                           | 1e-23   | -5.409e+010 | 0.0000              | 567.0                         | 23.18%                            | 6766.7                            | 15.37%                               | <a href="#">motif file</a>     | <a href="#">svg</a> |  |  |  |  |  |  |  |  |                                           |  |  |  |  |  |  |  |  |  |  |  |  |  |  |  |  |  |  |  |
| 29                                                                | AGCCAATCAG        | NTF1(CCAAT)/Promoter/Homer                                           | 1e-22   | -5.282e+010 | 0.0000              | 392.0                         | 16.03%                            | 4217.8                            | 9.58%                                | <a href="#">motif file</a>     | <a href="#">svg</a> |  |  |  |  |  |  |  |  |                                           |  |  |  |  |  |  |  |  |  |  |  |  |  |  |  |  |  |  |  |
| 30                                                                | CAATTCCCTCT       | Erv2(ETS)/ES-Erv1-ChIP-Seq(GSE59402)/Homer                           | 1e-22   | -5.192e+010 | 0.0000              | 361.0                         | 14.76%                            | 3800.2                            | 8.63%                                | <a href="#">motif file</a>     | <a href="#">svg</a> |  |  |  |  |  |  |  |  |                                           |  |  |  |  |  |  |  |  |  |  |  |  |  |  |  |  |  |  |  |
| 31                                                                | ACAGGAAGTG        | ETS1(ETS)/Jurkat-ETS1-ChIP-Seq(GSE17954)/Homer                       | 1e-22   | -5.084e+010 | 0.0000              | 410.0                         | 16.76%                            | 4524.2                            | 10.28%                               | <a href="#">motif file</a>     | <a href="#">svg</a> |  |  |  |  |  |  |  |  |                                           |  |  |  |  |  |  |  |  |  |  |  |  |  |  |  |  |  |  |  |
| 32                                                                | AGAGGAAGTG        | PU.1(ETS)/ThioMac-PU.1-ChIP-Seq(GSE21512)/Homer                      | 1e-21   | -4.913e+010 | 0.0000              | 184.0                         | 7.52%                             | 1515.5                            | 3.44%                                | <a href="#">motif file</a>     | <a href="#">svg</a> |  |  |  |  |  |  |  |  |                                           |  |  |  |  |  |  |  |  |  |  |  |  |  |  |  |  |  |  |  |
| 33                                                                | ACAGGAAGT         | Ets1-distal(ETS)/CD4+PolII-ChIP-Seq(Burski_et_al)/Homer              | 1e-20   | -4.707e+010 | 0.0000              | 129.0                         | 5.27%                             | 904.9                             | 2.06%                                | <a href="#">motif file</a>     | <a href="#">svg</a> |  |  |  |  |  |  |  |  |                                           |  |  |  |  |  |  |  |  |  |  |  |  |  |  |  |  |  |  |  |
| 34                                                                | CCCCCCCCCCCC      | Sp1(Zf)/Promoter/Homer                                               | 1e-19   | -4.419e+010 | 0.0000              | 152.0                         | 6.21%                             | 1202.5                            | 2.73%                                | <a href="#">motif file</a>     | <a href="#">svg</a> |  |  |  |  |  |  |  |  |                                           |  |  |  |  |  |  |  |  |  |  |  |  |  |  |  |  |  |  |  |
| 35                                                                | CAATTCCGGT        | Elk1(ETS)/Hela-Elk1-ChIP-Seq(GSE31477)/Homer                         | 1e-18   | -4.146e+010 | 0.0000              | 280.0                         | 11.45%                            | 2910.2                            | 6.61%                                | <a href="#">motif file</a>     | <a href="#">svg</a> |  |  |  |  |  |  |  |  |                                           |  |  |  |  |  |  |  |  |  |  |  |  |  |  |  |  |  |  |  |
| 36                                                                | CCCCCCCCCCCC      | Sp2(Zf)/HEK293-Sp2-eGFP-ChIP-Seq(Encode)/Homer                       | 1e-17   | -4.139e+010 | 0.0000              | 485.0                         | 19.83%                            | 5910.1                            | 13.42%                               | <a href="#">motif file</a>     | <a href="#">svg</a> |  |  |  |  |  |  |  |  |                                           |  |  |  |  |  |  |  |  |  |  |  |  |  |  |  |  |  |  |  |
| 37                                                                | CAATTCCCTCT       | Fli1(ETS)/CD8-Fli1-ChIP-Seq(GSE20898)/Homer                          | 1e-17   | -4.087e+010 | 0.0000              | 467.0                         | 19.09%                            | 5653.3                            | 12.84%                               | <a href="#">motif file</a>     | <a href="#">svg</a> |  |  |  |  |  |  |  |  |                                           |  |  |  |  |  |  |  |  |  |  |  |  |  |  |  |  |  |  |  |
| 38                                                                | CTGACGTCA         | Air7(2ZIP)/3T3L1-Air7-ChIP-Seq(GSE56872)/Homer                       | 1e-17   | -4.032e+010 | 0.0000              | 142.0                         | 5.81%                             | 1137.7                            | 2.58%                                | <a href="#">motif file</a>     | <a href="#">svg</a> |  |  |  |  |  |  |  |  |                                           |  |  |  |  |  |  |  |  |  |  |  |  |  |  |  |  |  |  |  |
