# Supplementary material
Source: PubMed Central journal article supplement (PMC7848695)
Supplement: pnas.2014634118.sd04.pdf [file pnas.2014634118.sd04.pdf]

# Homer de novo Motif Results

(/zfs/venom/Crotalus\_genomes/Ctigris\_CLP2741/ATAC\_Seq/HOMER/Macs2\_Run1/Macs2\_Filtered\_Hard50Overlap\_ATAC\_All\_VG\_Combined\_peaks/)

[Known Motif Enrichment Results](#)

[Gene Ontology Enrichment Results](#)

If Homer is having trouble matching a motif to a known motif, try copy/pasting the matrix file into [STAMP](#)

More information on motif finding results: [HOMER](#) | [Description of Results](#) | [Tips](#)

Total target sequences = 7873

Total background sequences = 41160

\* - possible false positive

| Rank | Motif | P-value | log P-value | % of Targets | % of Background | STD(Bg STD)     | Best Match/Details                                                                                                                                  | Motif File                          |
|------|-------|---------|-------------|--------------|-----------------|-----------------|-----------------------------------------------------------------------------------------------------------------------------------------------------|-------------------------------------|
| 1    |       | 1e-372  | -8.575e+02  | 35.56%       | 16.34%          | 51.3bp (63.0bp) | NF1-halfsite(CTF)/LNCaP-NF1-ChIP-Seq(Unpublished)/Homer(0.940)<br><a href="#">More Information</a>   <a href="#">Similar Motifs Found</a>           | <a href="#">motif file (matrix)</a> |
| 2    |       | 1e-336  | -7.746e+02  | 25.92%       | 10.28%          | 51.7bp (63.1bp) | NF1-FOXA1(CTF,Forkhead)/LNCAP-FOXA1-ChIP-Seq(GSE27824)/Homer(0.860)<br><a href="#">More Information</a>   <a href="#">Similar Motifs Found</a>      | <a href="#">motif file (matrix)</a> |
| 3    |       | 1e-240  | -5.532e+02  | 15.32%       | 5.21%           | 49.8bp (63.8bp) | GRHL2/MA1105.1/Jaspar(0.909)<br><a href="#">More Information</a>   <a href="#">Similar Motifs Found</a>                                             | <a href="#">motif file (matrix)</a> |
| 4    |       | 1e-144  | -3.327e+02  | 1.17%        | 0.01%           | 36.3bp (54.4bp) | POL012.1_TATA-Box/Jaspar(0.587)<br><a href="#">More Information</a>   <a href="#">Similar Motifs Found</a>                                          | <a href="#">motif file (matrix)</a> |
| 5    |       | 1e-140  | -3.240e+02  | 1.03%        | 0.01%           | 37.8bp (37.8bp) | ESR2/MA0258.2/Jaspar(0.624)<br><a href="#">More Information</a>   <a href="#">Similar Motifs Found</a>                                              | <a href="#">motif file (matrix)</a> |
| 6    |       | 1e-128  | -2.958e+02  | 29.63%       | 18.39%          | 53.5bp (62.2bp) | NFIX/MA0671.1/Jaspar(0.760)<br><a href="#">More Information</a>   <a href="#">Similar Motifs Found</a>                                              | <a href="#">motif file (matrix)</a> |
| 7    |       | 1e-125  | -2.897e+02  | 18.00%       | 9.29%           | 55.3bp (61.8bp) | ELF3(ETS)/PDAC-ELF3-ChIP-Seq(GSE64557)/Homer(0.878)<br><a href="#">More Information</a>   <a href="#">Similar Motifs Found</a>                      | <a href="#">motif file (matrix)</a> |
| 8    |       | 1e-124  | -2.875e+02  | 1.04%        | 0.01%           | 40.9bp (67.5bp) | SMAD3/MA0795.1/Jaspar(0.757)<br><a href="#">More Information</a>   <a href="#">Similar Motifs Found</a>                                             | <a href="#">motif file (matrix)</a> |
| 9    |       | 1e-118  | -2.722e+02  | 2.63%        | 0.30%           | 54.3bp (48.3bp) | SIX1/MA1118.1/Jaspar(0.608)<br><a href="#">More Information</a>   <a href="#">Similar Motifs Found</a>                                              | <a href="#">motif file (matrix)</a> |
| 10   |       | 1e-114  | -2.641e+02  | 51.57%       | 38.86%          | 58.0bp (68.3bp) | Foxo3(Forkhead)/U2OS-Foxo3-ChIP-Seq(E-MTAB-2701)/Homer(0.802)<br><a href="#">More Information</a>   <a href="#">Similar Motifs Found</a>            | <a href="#">motif file (matrix)</a> |
| 11   |       | 1e-109  | -2.514e+02  | 0.98%        | 0.02%           | 54.8bp (30.5bp) | Gata4/MA0482.1/Jaspar(0.664)<br><a href="#">More Information</a>   <a href="#">Similar Motifs Found</a>                                             | <a href="#">motif file (matrix)</a> |
| 12   |       | 1e-94   | -2.170e+02  | 1.04%        | 0.03%           | 40.3bp (80.9bp) | PH0117.1_Nkx3-1/Jaspar(0.698)<br><a href="#">More Information</a>   <a href="#">Similar Motifs Found</a>                                            | <a href="#">motif file (matrix)</a> |
| 13   |       | 1e-87   | -2.019e+02  | 0.91%        | 0.02%           | 50.0bp (43.7bp) | Sox4(HMG)/proB-Sox4-ChIP-Seq(GSE50066)/Homer(0.792)<br><a href="#">More Information</a>   <a href="#">Similar Motifs Found</a>                      | <a href="#">motif file (matrix)</a> |
| 14   |       | 1e-86   | -1.981e+02  | 1.28%        | 0.07%           | 55.3bp (47.7bp) | CREB1/MA0018.3/Jaspar(0.736)<br><a href="#">More Information</a>   <a href="#">Similar Motifs Found</a>                                             | <a href="#">motif file (matrix)</a> |
| 15   |       | 1e-81   | -1.873e+02  | 1.12%        | 0.05%           | 62.7bp (69.5bp) | Sox5/MA0087.1/Jaspar(0.756)<br><a href="#">More Information</a>   <a href="#">Similar Motifs Found</a>                                              | <a href="#">motif file (matrix)</a> |
| 16   |       | 1e-78   | -1.800e+02  | 2.15%        | 0.33%           | 52.4bp (41.6bp) | PRDM10(Zf)/HEK293-PRDM10.eGFP-ChIP-Seq(Encode)/Homer(0.675)<br><a href="#">More Information</a>   <a href="#">Similar Motifs Found</a>              | <a href="#">motif file (matrix)</a> |
| 17   |       | 1e-74   | -1.714e+02  | 0.50%        | 0.00%           | 46.7bp (0.0bp)  | NFIL3/MA0025.1/Jaspar(0.774)<br><a href="#">More Information</a>   <a href="#">Similar Motifs Found</a>                                             | <a href="#">motif file (matrix)</a> |
| 18   |       | 1e-74   | -1.712e+02  | 0.66%        | 0.01%           | 52.4bp (54.6bp) | GRHL1/MA0647.1/Jaspar(0.604)<br><a href="#">More Information</a>   <a href="#">Similar Motifs Found</a>                                             | <a href="#">motif file (matrix)</a> |
| 19   |       | 1e-72   | -1.659e+02  | 0.71%        | 0.02%           | 65.0bp (52.4bp) | YY1/MA0095.2/Jaspar(0.649)<br><a href="#">More Information</a>   <a href="#">Similar Motifs Found</a>                                               | <a href="#">motif file (matrix)</a> |
| 20   |       | 1e-65   | -1.518e+02  | 0.64%        | 0.01%           | 60.4bp (75.3bp) | LIN54/MA0619.1/Jaspar(0.612)<br><a href="#">More Information</a>   <a href="#">Similar Motifs Found</a>                                             | <a href="#">motif file (matrix)</a> |
| 21   |       | 1e-64   | -1.492e+02  | 0.51%        | 0.01%           | 62.1bp (31.1bp) | Rfx5(HTH)/GM12878-Rfx5-ChIP-Seq(GSE31477)/Homer(0.569)<br><a href="#">More Information</a>   <a href="#">Similar Motifs Found</a>                   | <a href="#">motif file (matrix)</a> |
| 22   |       | 1e-62   | -1.446e+02  | 1.37%        | 0.15%           | 56.0bp (51.0bp) | p53(p53)/mES-cMyc-ChIP-Seq(GSE11431)/Homer(0.611)<br><a href="#">More Information</a>   <a href="#">Similar Motifs Found</a>                        | <a href="#">motif file (matrix)</a> |
| 23   |       | 1e-54   | -1.262e+02  | 0.44%        | 0.00%           | 45.6bp (58.4bp) | IRF5/MA1420.1/Jaspar(0.691)<br><a href="#">More Information</a>   <a href="#">Similar Motifs Found</a>                                              | <a href="#">motif file (matrix)</a> |
| 24   |       | 1e-50   | -1.172e+02  | 0.42%        | 0.01%           | 44.8bp (15.0bp) | PB0050.1_Osr1_1/Jaspar(0.606)<br><a href="#">More Information</a>   <a href="#">Similar Motifs Found</a>                                            | <a href="#">motif file (matrix)</a> |
| 25   |       | 1e-47   | -1.083e+02  | 0.39%        | 0.01%           | 43.8bp (49.0bp) | Pax7(Paired.Homeobox),long/Myoblast-Pax7-ChIP-Seq(GSE25064)/Homer(0.645)<br><a href="#">More Information</a>   <a href="#">Similar Motifs Found</a> | <a href="#">motif file (matrix)</a> |
| 26   |       | 1e-44   | -1.025e+02  | 3.20%        | 1.14%           | 51.5bp (59.0bp) | PB0090.1_Zbtb12_1/Jaspar(0.631)<br><a href="#">More Information</a>   <a href="#">Similar Motifs Found</a>                                          | <a href="#">motif file (matrix)</a> |
| 27   |       | 1e-41   | -9.520e+01  | 0.36%        | 0.01%           | 50.3bp (17.2bp) | PB0194.1_Zbtb12_2/Jaspar(0.653)<br><a href="#">More Information</a>   <a href="#">Similar Motifs Found</a>                                          | <a href="#">motif file (matrix)</a> |
| 28   |       | 1e-38   | -8.751e+01  | 0.42%        | 0.01%           | 56.7bp (35.0bp) | PB0179.1_Sp100_2/Jaspar(0.701)<br><a href="#">More Information</a>   <a href="#">Similar Motifs Found</a>                                           | <a href="#">motif file (matrix)</a> |
| 29   |       | 1e-33   | -7.793e+01  | 2.69%        | 1.02%           | 52.5bp (53.3bp) | Pitx1(Homeobox)/Chicken-Pitx1-ChIP-Seq(GSE38910)/Homer(0.777)<br><a href="#">More Information</a>   <a href="#">Similar Motifs Found</a>            | <a href="#">motif file (matrix)</a> |
| 30   |       | 1e-28   | -6.549e+01  | 0.66%        | 0.08%           | 54.1bp (48.7bp) | HIC2/MA0738.1/Jaspar(0.701)<br><a href="#">More Information</a>   <a href="#">Similar Motifs Found</a>                                              | <a href="#">motif file (matrix)</a> |
| 31   |       | 1e-27   | -6.363e+01  | 12.71%       | 8.97%           | 57.6bp (61.7bp) | MZF1(var.2)/MA0057.1/Jaspar(0.758)<br><a href="#">More Information</a>   <a href="#">Similar Motifs Found</a>                                       | <a href="#">motif file (matrix)</a> |
| 32   |       | 1e-22   | -5.231e+01  | 7.27%        | 4.72%           | 55.3bp (68.1bp) | E2F4/MA0470.1/Jaspar(0.682)<br><a href="#">More Information</a>   <a href="#">Similar Motifs Found</a>                                              | <a href="#">motif file (matrix)</a> |
| 33   |       | 1e-21   | -4.845e+01  | 1.19%        | 0.37%           | 50.3bp (56.3bp) | GCM2/MA0767.1/Jaspar(0.741)<br><a href="#">More Information</a>   <a href="#">Similar Motifs Found</a>                                              | <a href="#">motif file (matrix)</a> |
| 34   |       | 1e-14   | -3.320e+01  | 0.39%        | 0.06%           | 57.6bp (65.6bp) | PB0094.1_Zfp128_1/Jaspar(0.708)<br><a href="#">More Information</a>   <a href="#">Similar Motifs Found</a>                                          | <a href="#">motif file (matrix)</a> |
| 35 * |       | 1e-10   | -2.479e+01  | 0.86%        | 0.34%           | 58.9bp (85.5bp) | PB0095.1_Zfp161_1/Jaspar(0.878)<br><a href="#">More Information</a>   <a href="#">Similar Motifs Found</a>                                          | <a href="#">motif file (matrix)</a> |
