# Supplementary material
Source: PubMed Central journal article supplement (PMC7848695)
Supplement: pnas.2014634118.sd05.pdf [file pnas.2014634118.sd05.pdf]

| Total Target Sequences = 7871, Total Background Sequences = 41171 |  |  |  |  |  |          |            |   |      |  |  |
|-------------------------------------------------------------------|--|--|--|--|--|----------|------------|---|------|--|--|
|                                                                   |  |  |  |  |  | # Target | % of $\pi$ | # | % of |  |  |

|     |                                                                                     |                                          |      |            |        |       |        |        |        |                      |                      |
|-----|-------------------------------------------------------------------------------------|------------------------------------------|------|------------|--------|-------|--------|--------|--------|----------------------|----------------------|
| 168 | 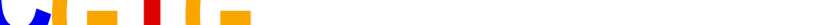 | Seq(Encode)/Homer                        | 1e-2 | -4.809e+00 | 0.0308 | 610.0 | 7.75%  | 2897.8 | 7.04%  | <a href="#">file</a> | <a href="#">330p</a> |
| 169 |  | MaxZD/HepG2,Max-ChIP-Seq(GSE31477)/Homer | 1e-2 | -4.642e+00 | 0.0244 | 919.0 | 11.67% | 4460.9 | 10.84% | <a href="#">file</a> | <a href="#">330p</a> |
